# Supplementary material for: Educational disparities in perinatal health in Denmark in the first decade of the 21st century: a register-based cohort study
Source: PubMed Central journal article supplement — BMJ Open. 2018 Nov 8;8(11):e023531. doi: 10.1136/bmjopen-2018-023531 (PMC6231602; doi:10.1136/bmjopen-2018-023531), 2018-11-08
Supplement: bmjopen-2018-023531.draft_revisions.pdf [file bmjopen-2018-023531.draft_revisions.pdf]

# BMJ Open

BMJ Open is committed to open peer review. As part of this commitment we make the peer review history of every article we publish publicly available.

When an article is published we post the peer reviewers' comments and the authors' responses online. We also post the versions of the paper that were used during peer review. These are the versions that the peer review comments apply to.

The versions of the paper that follow are the versions that were submitted during the peer review process. They are not the versions of record or the final published versions. They should not be cited or distributed as the published version of this manuscript.

BMJ Open is an open access journal and the full, final, typeset and author-corrected version of record of the manuscript is available on our site with no access controls, subscription charges or pay-per-view fees (<http://bmjopen.bmj.com>).

If you have any questions on BMJ Open's open peer review process please email [editorial.bmjopen@bmj.com](mailto:editorial.bmjopen@bmj.com)

# BMJ Open

## Educational disparities in perinatal health in Denmark in the first decade of the 21st century: A register study of 649,905 children

|                               |                                                                                                                                                                                                                                                                                                                                                                                          |
|-------------------------------|------------------------------------------------------------------------------------------------------------------------------------------------------------------------------------------------------------------------------------------------------------------------------------------------------------------------------------------------------------------------------------------|
| Journal:                      | <i>BMJ Open</i>                                                                                                                                                                                                                                                                                                                                                                          |
| Manuscript ID                 | bmjopen-2018-023531                                                                                                                                                                                                                                                                                                                                                                      |
| Article Type:                 | Research                                                                                                                                                                                                                                                                                                                                                                                 |
| Date Submitted by the Author: | 13-Apr-2018                                                                                                                                                                                                                                                                                                                                                                              |
| Complete List of Authors:     | Bilsteen, Josephine; Department of Public Health, University of Copenhagen<br>Andresen, Josefine; Department of Public Health, University of Copenhagen<br>Mortensen, Laust; Department of Public Health, University of Copenhagen<br>Hansen, Anne; Department of Public Health, University of Copenhagen<br>Andersen, Anne-Marie; Department of Public Health, University of Copenhagen |
| Keywords:                     | Health inequalities, Congenital anomalies, Preterm birth, Small-for-gestational age, Stillbirth, Infant mortality                                                                                                                                                                                                                                                                        |
|                               |                                                                                                                                                                                                                                                                                                                                                                                          |

SCHOLARONE™  
Manuscripts

Peer Review Only

1 **Educational disparities in perinatal health in Denmark in the first decade of the 21<sup>st</sup> century: A**  
2  
3 **register study of 649,905 children**  
4  
5

6  
7 Josephine Funck Bilsteen<sup>1\*</sup>, [jfbi@sund.ku.dk](mailto:jfbi@sund.ku.dk)

8  
9 Josefine Bernhard Andresen<sup>1</sup>, [vln522@alumni.ku.dk](mailto:vln522@alumni.ku.dk)

10  
11 Laust Hvas Mortensen<sup>1</sup> [lamo@sund.ku.dk](mailto:lamo@sund.ku.dk)

12  
13 Anne Vinkel Hansen<sup>1</sup> [avih@sund.ku.dk](mailto:avih@sund.ku.dk)

14  
15 Anne-Marie Nybo Andersen<sup>1</sup> [amny@sund.ku.dk](mailto:amny@sund.ku.dk)

16  
17  
18  
19  
20 <sup>1</sup> Section of Social Medicine, Department of Public Health, University of Copenhagen, Copenhagen,  
21  
22 Denmark  
23

24  
25  
26 \* Corresponding author.

27  
28 Section of Social Medicine, Department of Public Health, University of Copenhagen,  
29  
30 Øster Farimagsgade 5, 1014 Copenhagen K, Denmark.  
31

32  
33 Email: [josephinefbilsteen@gmail.com](mailto:josephinefbilsteen@gmail.com), telephone: +45 41 66 13 81  
34  
35

36  
37 Word count: 3,749  
38  
39  
40  
41  
42  
43  
44  
45  
46  
47  
48  
49  
50  
51  
52  
53  
54  
55  
56  
57  
58  
59  
60

## ABSTRACT

**Objective:** To investigate socioeconomic differences in six perinatal health outcomes in Denmark in the first decade of the 21<sup>st</sup> century.

**Design:** A population-based cohort study.

**Setting:** Danish national registries.

**Participants:** A total 646,829 live born children and 3,076 stillborn children ( $\geq 22+0$  weeks of gestation) born in Denmark from 2000 through 2009. We excluded children with implausible relations between birth weight and gestational age ( $n=644$ ), children without information on maternal country of origin ( $n=138$ ), and implausible values of maternal year of birth ( $n=36$ ).

**Main outcome measures:** We investigated the following perinatal health outcomes: Stillbirth, neonatal and post-neonatal mortality, small-for-gestational age, preterm birth graded into moderate preterm, very preterm, and extremely preterm, and congenital anomalies registered in the first year of life.

**Results:** Maternal educational level was inversely associated with all adverse perinatal outcomes. For all examined outcomes the risk association displayed a clear gradient across the educational levels. The associations remained after adjustment for maternal age, maternal country of origin and calendar year. Compared to mothers with vocational education mothers with more than 15 years of education had an adjusted odds ratio for stillbirth of 0.64 [95% CI 0.56-0.73]. The corresponding adjusted odds ratios for neonatal mortality, post-neonatal mortality, congenital anomalies, moderate preterm birth, and small-for-gestational age were, respectively, 0.79 [95% CI 0.67-0.93], 0.56 [95% CI 0.41-0.77], 0.87 [95% CI 0.83-0.92], 0.79 [95% CI 0.76-0.82] and 0.81 [95% CI 0.79-0.84].

**Conclusion:** Substantial educational inequalities in perinatal health were still present in the Denmark in first decade of the 21<sup>st</sup> century.

**Keywords:** Health inequalities; Stillbirth, Infant mortality; Congenital anomalies; Preterm birth; Small-for-gestational age.

## ARTICLE SUMMARY

### Strengths and limitations of this study

- Danish national registries with high degree of completeness and quality were used in this study.
- The large study population enabled investigation of rare perinatal outcomes.
- The grading of maternal education into five categories enabled detailed investigation of the educational gradients.
- Congenital anomalies are not registered for stillbirths and spontaneous abortions during the study period and as a consequence we could only estimate risk among live born children.

## INTRODUCTION

The Nordic countries are generally regarded as egalitarian and have a low prevalence of adverse perinatal outcomes. However in the 1980s and 1990s strong socioeconomic gradients in adverse perinatal outcomes were observed in Denmark, Finland, Norway and Sweden. Several studies documented socioeconomic inequalities in respectively stillbirth, preterm birth, birth weight, infant mortality in all of the Nordic countries[1–4] but studies have been inconclusive with regards to congenital anomalies.[5–8]

During the first decade of the 21<sup>st</sup> century economic inequality rose in Denmark and elsewhere[9–11], but it is unclear what impact this has had on inequalities in perinatal health. Perinatal health measures, such as infant mortality, are used internationally as indicators of population health status. In addition, perinatal outcomes such as preterm birth and foetal growth are predictive at the individual level for health later in life. Several studies have found that low birth weight is related to the risk of chronic diseases in adulthood, such as type 2 diabetes and cardiovascular disease.[12,13] The health condition of the mother affects perinatal outcomes, thereby transferring socioeconomic inequality in health from one generation to the next.[13]

Socioeconomic position refers to the economic and social indicators that influence what positions individuals or groups hold within the structure of a society.[14] In this study educational level has been chosen as a measure of socioeconomic position because education is a favourable indicator of socioeconomic position in early adult life. Furthermore education is associated to future occupational status and income.[15]

The aim of this study was to describe the associations between maternal educational level and risk of adverse perinatal outcomes in Denmark during the first decade of the 21<sup>st</sup> century. The adverse perinatal outcomes of interest in this study were stillbirth, preterm birth, small-for-gestational age (SGA), congenital anomalies, neonatal mortality and post-neonatal mortality.

## METHODS

We did a longitudinal register linkage study of all live births and stillbirths in Denmark from 2000 through 2009, as recorded in the Danish Medical Birth Register. Information on maternal educational level from the Population's Education register[16] was linked to information on perinatal health outcomes from the Danish Medical Birth Register[17], the Danish National Patient Register[18], and the Danish Register of Causes of Death [19]. The Danish system of unique person identifiers (CPR-number) was used to link individuals across the different registers in an anonymised data set in Statistics Denmark, which could be assessed via a VPN connection from Department of Public Health, University of Copenhagen.

### Study populations

The study population consisted of all live born and stillborn children born in Denmark during the study period. Children were excluded from the study population as illustrated in Figure 1. Maternal year of birth was considered implausible after year 1999 and implausible relations between gestational age and birth weight were defined according to the method described by Alexander et al.[20] After the exclusions Analysis Population 1 consisted of a total of 649,905 live and stillborn children. Analysis population 2 consisted of 646,829 live born when stillborn children were excluded from Analysis Population 1. In the analysis of SGA children missing information on birth weight (n=4388) were not included.

### Patient and Public Involvement

Patient and public were not involved as data was obtained from Danish national registers.

### Study variables

The main exposure variable of interest was maternal educational level, defined as the highest educational level attained or expected (based on ongoing education) of the mother at the year of birth categorized into five categories: Primary education ( $\leq 9$  years), secondary education (high school *10-12 years*), vocational education (*10-12 years*), short- and medium-cycle higher education (*12-15 years*), long-cycle higher education ( $>15$  years), and missing. Since the education register is based on reports from Danish

1 educational institutions, the category of missing is comprised of individuals who are not registered at any  
2 education in Denmark.  
3

4  
5 Information on birth weight and the outcomes preterm birth and stillbirth were obtained from the Medical  
6 Birth Register. SGA was defined as birth weight falling below the 10th percentile of birth weight  
7 according to sex-specific intrauterine growth curves presented by Marsàl et al.[21] Preterm birth was  
8 divided into extremely preterm birth defined as birth  $\geq 22+0 - 27+6$  weeks, very preterm birth defined as  
9 birth  $\geq 28+0 - 31+6$ , and moderately preterm birth defined as birth  $\geq 32+0 - 36+6$ . The variable stillbirth  
10 was defined as foetal death at or after 22 completed gestational weeks. In Denmark, the threshold between  
11 spontaneous abortions and stillbirths was changed in 2004 from 28 completed weeks of gestation to 22  
12 completed weeks of gestation. All pregnancies from 2000 to 2003 for which a spontaneous abortion was  
13 registered after 22 completed weeks of gestation were recoded into stillbirths. Information on infant  
14 mortality was obtained from The Central Person Register and The Danish Register of Causes of Death.  
15 Neonatal mortality was defined as death of a live born child before or at day 27 after birth and post-  
16 neonatal mortality was defined as death of a live born child at or after day 28 through day 365 after birth.  
17 Information on congenital anomalies was obtained from the Danish National Patient Register. The  
18 variable congenital anomalies registered in first year of life were defined according to EuroCAT's  
19 definitions excluding minor anomalies according to EuroCAT criteria.[22]  
20  
21  
22  
23  
24  
25  
26  
27  
28  
29  
30  
31  
32  
33  
34  
35  
36  
37  
38

39 Other potential confounders in the analysis were the maternal year of birth (*<1965, 1965-69, 1970-74,*  
40 *1975-79,  $\geq 1980$*  maternal age at the time of delivery (*<25 years, 25-29 years, 30-34 years, 35-39 years,*  
41  *$\geq 40$  years*), Offspring's year of birth (*2000-01, 2002-03, 2004-05, 2006-07, 2008-09*), and country of  
42 origin of the mother categorized as Denmark, "Other western country" (*Andorra, Australia, Canada,*  
43 *Iceland, Liechtenstein, Monaco, New Zealand, Norway, San Marino, Switzerland, United States of*  
44 *America, Vatican City State and all EU member countries except Denmark*) or "Non-western country" (*all*  
45 *remaining countries*).  
46  
47  
48  
49  
50  
51  
52  
53  
54  
55

## 56 **Statistics**

57  
58  
59  
60



Initially, we calculated the prevalence for the six perinatal outcomes by maternal educational level. To investigate the associations between maternal educational level and the perinatal outcomes we used multiple logistic regression analyses and the analysis populations were restricted to children with information on maternal educational level. The a priori chosen model for adjustment included the covariates maternal age, maternal country of origin, and maternal year of birth as these were considered potential confounders. The variable year of birth of the offspring was not included in the model since the variables maternal age at time of delivery and maternal year of birth in combination practically describe the variable. Unadjusted and adjusted odds ratios (OR) were presented with a 95% confidence interval. Additionally, we fitted two models to test robustness of the findings: one adjusted for maternal age only and the second including maternal age, parity and country of origin, and year of birth as covariates. However, since the findings from the two models fitted to test robustness were similar to findings from the other adjusted model their findings are not shown. All statistical analyses were conducted in SAS 9.4.

## RESULTS

The distributions of maternal educational level by maternal age, maternal country of origin and calendar year of birth are presented in Table 1. In Denmark, maternal completed and on-going educational level increased during the study period as shown in Table 1. The proportion of mothers born outside Denmark was higher among mothers with missing educational level.

**Table 1 Maternal age, year of birth, and country of origin, and offspring's year of birth by educational level, all children born in Denmark 2000-2009**

|                               | All children<br>n=649,905 | Primary education<br>n=106,129 | Vocational education<br>n=222,744 | Secondary education<br>n=46,026 | Short and medium-cycle higher education<br>n=185,417 | Long-cycle higher education<br>n=94,168 | Missing<br>n=15,421 |
|-------------------------------|---------------------------|--------------------------------|-----------------------------------|---------------------------------|------------------------------------------------------|-----------------------------------------|---------------------|
|                               | %                         | %                              | %                                 | %                               | %                                                    | %                                       | %                   |
| <b>Maternal age</b>           |                           |                                |                                   |                                 |                                                      |                                         |                     |
| <25                           | 12.3                      | 32.6                           | 12.2                              | 17.8                            | 3.8                                                  | 2.3                                     | 20.0                |
| 25-29                         | 33.5                      | 30.9                           | 37.4                              | 31.2                            | 25.4                                                 | 26.2                                    | 34.6                |
| 30-34                         | 36.3                      | 23.0                           | 34.5                              | 32.6                            | 42.1                                                 | 46.9                                    | 28.0                |
| 35-39                         | 15.3                      | 11.0                           | 13.8                              | 15.8                            | 16.4                                                 | 21.1                                    | 14.0                |
| ≥40                           | 2.6                       | 2.4                            | 2.1                               | 2.6                             | 2.7                                                  | 3.5                                     | 3.4                 |
| <b>Maternal year of birth</b> |                           |                                |                                   |                                 |                                                      |                                         |                     |
| <1965                         | 4.2                       | 4.1                            | 3.8                               | 4.6                             | 4.3                                                  | 4.8                                     | 4.5                 |
| 1965-69                       | 16.5                      | 12.3                           | 16.4                              | 17.6                            | 17.0                                                 | 20.7                                    | 12.6                |

|                                   |      |      |      |      |      |      |      |
|-----------------------------------|------|------|------|------|------|------|------|
| 1970-74                           | 33.5 | 24.0 | 33.0 | 32.4 | 37.6 | 39.6 | 24.2 |
| 1975-79                           | 30.6 | 28.8 | 32.0 | 27.9 | 31.8 | 28.3 | 31.1 |
| ≥1980                             | 15.2 | 30.8 | 14.8 | 17.6 | 9.8  | 6.7  | 27.7 |
| <b>Maternal country of origin</b> |      |      |      |      |      |      |      |
| Denmark                           | 86.2 | 74.7 | 91.0 | 77.6 | 93.2 | 92.0 | 10.7 |
| Western countries                 | 3.1  | 1.3  | 1.9  | 3.8  | 2.6  | 4.3  | 26.3 |
| Non-western countries             | 10.7 | 24.0 | 7.2  | 18.6 | 4.3  | 3.7  | 63.0 |
| <b>Year of birth (offspring)</b>  |      |      |      |      |      |      |      |
| 2000-2001                         | 20.5 | 24.2 | 22.3 | 23.7 | 17.9 | 16.0 | 20.2 |
| 2002-2003                         | 19.9 | 21.1 | 20.9 | 22.1 | 18.8 | 18.0 | 14.9 |
| 2004-2005                         | 20.0 | 19.6 | 20.1 | 20.1 | 20.6 | 20.0 | 12.6 |
| 2006-2007                         | 20.0 | 18.0 | 19.1 | 18.2 | 21.5 | 22.2 | 21.0 |
| 2008-2009                         | 19.7 | 17.1 | 17.7 | 15.9 | 21.2 | 23.8 | 31.3 |

The prevalence of stillbirth, neonatal mortality, post-neonatal mortality, congenital anomalies, SGA, and three degrees of preterm birth, respectively, by maternal educational level are shown in Table 2. Women with the shortest education had a higher prevalence of all of the adverse perinatal outcomes compared to women with higher educational level. The group of women with unknown educational level had the highest prevalence of stillbirth and SGA compared to the women with known educational level.

**Table 2 Prevalence of adverse perinatal outcome by educational level, Denmark, 2000-2009**

|                             | Stillbirth | Neonatal mortality | Post-neonatal mortality | Congenital anomalies | SGA      | Moderate preterm birth<br>32+0-36+6 | Very preterm birth<br>28+0-31+6 | Extreme preterm birth<br><28+0 |
|-----------------------------|------------|--------------------|-------------------------|----------------------|----------|-------------------------------------|---------------------------------|--------------------------------|
|                             | n=3,076    | n=1,688            | n=648                   | n=19,449             | n=59,979 | n=36,610                            | n=4,670                         | n=1,843                        |
|                             | Per 1000   | Per 1000           | Per 1000                | Per 1000             | Per 1000 | Per 1000                            | Per 1000                        | Per 1000                       |
| <b>Primary education</b>    | 6.7        | 3.6                | 1.9                     | 34.9                 | 125.9    | 64.5                                | 8.3                             | 4.1                            |
| <b>Vocational education</b> | 4.8        | 2.7                | 1.0                     | 30.7                 | 95.1     | 60.0                                | 7.8                             | 3.0                            |
| <b>Secondary education</b>  | 4.0        | 2.5                | 1.0                     | 28.2                 | 94.2     | 52.7                                | 7.0                             | 2.4                            |
| <b>Short and medium-</b>    | 4.3        | 2.2                | 0.7                     | 28.7                 | 77.9     | 53.7                                | 6.6                             | 2.3                            |
| <b>Long-cycle higher</b>    | 3.1        | 2.1                | 0.5                     | 27.1                 | 77.9     | 48.8                                | 6.3                             | 2.4                            |
| <b>Missing</b>              | 7.1        | 3.0                | 1.2                     | 28.9                 | 126.5    | 51.2                                | 5.9                             | 3.1                            |

Table 3 shows the relative risks, expressed as adjusted and unadjusted OR, of respectively stillbirth, neonatal mortality, post-neonatal mortality, congenital anomalies, SGA, and moderately preterm birth, very preterm birth, and extremely preterm birth, with mothers with vocational education as the comparison group. Compared to mothers with vocational education mothers with primary education had a statistically significant increased OR for stillbirth, neonatal mortality, post-neonatal mortality, congenital

1 anomalies, moderate preterm birth, very preterm birth, extreme preterm birth and SGA. Women with short  
 2 and medium-cycle higher education and women with long-cycle higher education had a statistically  
 3 significant lower risk of all the six perinatal outcomes compared to women with vocational education.  
 4  
 5 These results indicated consistently inverse educational gradients in the risk of adverse perinatal  
 6 outcomes. The gradients were consistent after adjusting for maternal age, maternal country of origin and  
 7 calendar year. The estimates were almost identical in analyses with adjustment for maternal age only and  
 8 with adjustment for maternal age, maternal country of origin, calendar year and parity (results not shown).  
 9  
 10  
 11  
 12  
 13  
 14  
 15

16 **Table 3 Adverse perinatal outcome by maternal educational level, all births Denmark, 2000-2009**

|                                                     | OR   | CI: 95 %  | aOR  | 95 %      |
|-----------------------------------------------------|------|-----------|------|-----------|
| <b>Stillbirth</b>                                   |      |           |      |           |
| Primary education                                   | 1.39 | 1.26-1.53 | 1.34 | 1.21-1.49 |
| Vocational education                                | 1.00 |           | 1.00 |           |
| Secondary education                                 | 0.84 | 0.71-0.98 | 0.80 | 0.69-0.94 |
| Short and medium-cycle higher education             | 0.89 | 0.81-0.97 | 0.89 | 0.81-0.97 |
| Long-cycle higher education                         | 0.64 | 0.57-0.73 | 0.63 | 0.56-0.72 |
| <b>Neonatal mortality</b>                           |      |           |      |           |
| Primary education                                   | 1.33 | 1.17-1.51 | 1.29 | 1.12-1.48 |
| Vocational education                                | 1.00 |           | 1.00 |           |
| Secondary education                                 | 0.92 | 0.76-1.13 | 0.90 | 0.73-1.10 |
| Short and medium-cycle higher education             | 0.79 | 0.70-0.90 | 0.80 | 0.71-0.92 |
| Long-cycle higher education                         | 0.79 | 0.67-0.93 | 0.79 | 0.67-0.93 |
| <b>Post-neonatal mortality<sup>a</sup></b>          |      |           |      |           |
| Primary education                                   | 1.94 | 1.59-2.36 | 1.81 | 1.47-2.22 |
| Vocational education                                | 1.00 |           | 1.00 |           |
| Secondary education                                 | 1.02 | 0.74-1.41 | 0.98 | 0.71-1.36 |
| Short and medium-cycle higher education             | 0.74 | 0.59-0.92 | 0.76 | 0.61-0.95 |
| Long-cycle higher education                         | 0.55 | 0.41-0.75 | 0.57 | 0.44-0.78 |
| <b>Congenital anomalies</b>                         |      |           |      |           |
| Primary education                                   | 1.14 | 1.10-1.19 | 1.13 | 1.08-1.18 |
| Vocational education                                | 1.00 |           | 1.00 |           |
| Secondary education                                 | 0.92 | 0.86-0.97 | 0.91 | 0.86-0.97 |
| Short and medium-cycle higher education             | 0.93 | 0.90-0.97 | 0.93 | 0.89-0.96 |
| Long-cycle higher education                         | 0.88 | 0.84-0.92 | 0.87 | 0.83-0.91 |
| <b>Moderate preterm birth 32+0-36+6<sup>b</sup></b> |      |           |      |           |
| Primary education                                   | 1.08 | 1.05-1.11 | 1.12 | 1.08-1.15 |
| Vocational education                                | 1.00 |           | 1.00 |           |
| Secondary education                                 | 0.87 | 0.83-0.91 | 0.89 | 0.85-0.93 |
| Short and medium-cycle higher education             | 0.89 | 0.86-0.91 | 0.88 | 0.85-0.90 |
| Long-cycle higher education                         | 0.80 | 0.78-0.83 | 0.79 | 0.76-0.82 |
| <b>Very preterm birth 28+0-31+6<sup>b</sup></b>     |      |           |      |           |
| Primary education                                   | 1.06 | 0.98-1.15 | 1.10 | 1.01-1.20 |
| Vocational education                                | 1.00 |           | 1.00 |           |
| Secondary education                                 | 0.89 | 0.79-1.01 | 0.91 | 0.80-1.03 |
| Short and medium-cycle higher education             | 0.83 | 0.77-0.90 | 0.82 | 0.76-0.88 |
| Long-cycle higher education                         | 0.80 | 0.73-0.88 | 0.78 | 0.71-0.86 |
| <b>Extreme preterm birth &lt;28+0<sup>b</sup></b>   |      |           |      |           |
| Primary education                                   | 1.36 | 1.20-1.54 | 1.35 | 1.19-1.54 |
| Vocational education                                | 1.00 |           | 1.00 |           |
| Secondary education                                 | 0.79 | 0.64-0.96 | 0.78 | 0.63-0.96 |

|                                         |      |           |      |           |
|-----------------------------------------|------|-----------|------|-----------|
| Short and medium-cycle higher education | 0.77 | 0.68-0.87 | 0.76 | 0.67-0.86 |
| Long-cycle higher education             | 0.78 | 0.67-0.91 | 0.76 | 0.65-0.88 |
| <b>SGA</b>                              |      |           |      |           |
| Primary education                       | 1.37 | 1.34-1.40 | 1.28 | 1.25-1.32 |
| Vocational education                    | 1.00 |           | 1.00 |           |
| Secondary education                     | 0.99 | 0.95-1.02 | 0.95 | 0.92-0.99 |
| Short and medium-cycle higher education | 0.80 | 0.79-0.82 | 0.82 | 0.80-0.84 |
| Long-cycle higher education             | 0.80 | 0.78-0.83 | 0.82 | 0.80-0.84 |

OR: Crude odds ratio, aOR: Odds ratio adjusted for maternal age, maternal country of origin and calendar year.

<sup>a</sup>Compared to children who were alive 365 days after birth.

<sup>b</sup>Compared to children born from 37+0 - 41+6

## DISCUSSION

In a population register study of perinatal outcomes in Denmark we found consistent inverse educational gradients for all perinatal outcomes in the study period, with higher rates of adverse outcomes in children of women with lower educational levels. Adjustments for maternal age, country of origin, parity and calendar year did not change the gradients.

An educational gradient in SGA was found in this study. This result is consistent with previous Nordic studies, which have reported socioeconomic inequalities in SGA.[5,23–28] Socioeconomic differences have been found in preterm birth as an overall outcome[5,23,24,29] and in preterm birth categorised according to gestational age.[3,26,28,30,31] This study found an educational gradient in moderate, very and extremely preterm birth. Consistently with previous studies[32–34] an educational gradient was found in stillbirth in this study. This study observed educational gradients in neonatal and post-neonatal mortality. Socioeconomic inequalities have been found in earlier Nordic studies in neonatal mortality[28,32,35–38] and also in post-neonatal mortality.[32,35,36,38]

We used population-covering register individual-based data with minimal sources of selection and information bias. The data from the Danish Medical Birth Register used in this study are of high quality.[17] The size of the study population enabled investigation of relatively rare perinatal outcomes like post-neonatal mortality. The data used from Statistics Denmark were all variables collected for administrative purposes, which according to the documentation from Statistics Denmark were so-called high quality variables.[39] Some limitations of the study should be discussed. In Denmark the registers

1 only obtain information on congenital anomalies for live births. The prevalence of congenital anomalies is  
2  
3 presumably higher among stillbirths, spontaneous and induced abortions than among live births.[40] A  
4  
5 socioeconomic gradient in stillbirth was observed in this study and consequently the socioeconomic  
6  
7 gradient in congenital anomalies could be underestimated. In order to understand the true association  
8  
9 between socioeconomic position and congenital anomalies it is essential to include information on  
10  
11 congenital anomalies for live births, stillbirths, induced abortions and spontaneous abortions.  
12  
13  
14  
15

16 In contrast to several previous studies we did not adjust for lifestyle factors such as smoking, alcohol  
17  
18 intake, BMI, and physical activity. In this study we were interested in estimating the overall effect of  
19  
20 maternal educational level on adverse perinatal outcome and as a consequence we did not adjust for  
21  
22 lifestyle factors as these were believed to mediate the association.  
23  
24  
25

26 Previous Nordic studies that investigated the association between socioeconomic position and congenital  
27  
28 anomalies reported inconsistent results.[5–8] In this study a statistically significant educational gradient in  
29  
30 congenital anomalies was observed. The discrepancy between the association of this study and the  
31  
32 associations of previous studies might be related to different socioeconomic measures used in the studies,  
33  
34 variation in number of participants, differences in types of congenital anomalies included and different  
35  
36 study populations in regard to inclusion of stillbirths.  
37  
38  
39  
40

41 The general level of education in Denmark increased during the study period. The proportion of women  
42  
43 who attained primary school and no further education declined slightly during the study period. However,  
44  
45 educational inequality in adverse perinatal outcomes was still observed. A contributing explanation of the  
46  
47 inequality is likely to be found in a possible selection of women with the lowest educational level.[37] The  
48  
49 group of women with primary education becomes more highly selected and thereby more socially  
50  
51 vulnerable[41] and this may contribute to the higher risk of adverse perinatal outcomes. The educational  
52  
53 distribution of mothers who give birth changes over time and also differs in the relatively similar Nordic  
54  
55  
56  
57  
58  
59

1 Welfare states this should make generalizations to other cohorts difficult. Nevertheless, socioeconomic  
2 differences in perinatal outcomes has been observed in different countries and in different time periods[4].  
3  
4  
5  
6

7 A possible part of the explanation of the observed educational differences is an overall healthier lifestyle  
8 among women with higher socioeconomic position. Certain lifestyle risk factors are more common among  
9 lower socioeconomic groups than among higher socioeconomic groups. For instance the prevalence of  
10 smokers is highest among women with lower educational level in Denmark[42] and smoking is associated  
11 with a higher risk of several adverse perinatal outcomes.[40] To investigate the mediating factors between  
12 socioeconomic position and adverse perinatal outcomes was beyond the scope of this article. However in  
13 order to reduce socioeconomic inequality in perinatal health future studies should focus on the mediating  
14 mechanisms in the association of socioeconomic position and adverse perinatal outcome  
15  
16  
17  
18  
19  
20  
21  
22  
23  
24  
25

## 26 **CONCLUSION**

27 Socioeconomic inequality in perinatal health was observed in Denmark in the first decade of the 21<sup>st</sup>  
28 century. Maternal educational gradients were evident in the rare but serious outcomes such as congenital  
29 anomalies and foetal and infant mortality. The socioeconomically patterned risk of preterm birth and  
30 growth restriction is worrying because it may be the first tracks on the way to socioeconomic inequalities  
31 in health later in life. Interventions to diminish socioeconomic inequality in the earliest phases of life are  
32 still needed.  
33  
34  
35  
36  
37  
38  
39  
40  
41  
42

43 Figure 1: Flowchart of the study populations  
44  
45  
46  
47

## 48 **LIST OF ABBREVIATIONS**

49 SGA: Small-for-gestational age OR: Odds ratios  
50  
51  
52  
53

## 54 **DECLARATIONS**

55  
56  
57  
58  
59  
60

1 **Ethics approval and consent to participate:** According to Danish legislation no ethical permission is  
2  
3 required for register-based research, however, the study was approved by the local data protection  
4  
5 authorities.  
6

7 **Consent for publication:** Not applicable.  
8

9 **Availability of data and material:** The data that support the findings of this study are available from  
10  
11 Statistics Denmark but restrictions apply to the availability of these data, which were used under license  
12  
13 for the current study, and so are not publicly available. Data are however available from the authors upon  
14  
15 reasonable request and with permission of Statistics Denmark.  
16  
17

18 **Competing interests:** The authors declare that they have no competing interests  
19

20 **Funding:** This project was partly supported by the NordForsk grant no. 75970 for the project Contingent  
21  
22 Life Courses.  
23

24 **Author contributions:** AMNA, JA and JB designed the study. JA and JB analysed the data with  
25  
26 assistance from AMNA, AVH and LM. JA and JB interpreted the data and prepared the first draft of the  
27  
28 manuscript, which was revised by AMNA, AVH and LM. All authors read and approved the final  
29  
30 manuscript.  
31  
32

33 **Acknowledgments:** We would like to thank Professor David Taylor Robinson for his comments and  
34  
35 suggestions.  
36  
37  
38  
39  
40  
41  
42  
43  
44  
45  
46  
47  
48  
49  
50  
51  
52  
53  
54  
55  
56  
57  
58  
59  
60



1  
2  
3  
4  
5  
6  
7  
8  
9  
10  
11  
12  
13  
14  
15  
16  
17  
18  
19  
20  
21  
22  
23  
24  
25  
26  
27  
28  
29  
30  
31  
32  
33  
34  
35  
36  
37  
38  
39  
40  
41  
42  
43  
44  
45  
46  
47  
48  
49  
50  
51  
52  
53  
54  
55  
56  
57  
58  
59  
60  
**REFERENCES**

- 1 Rom AL, Mortensen LH, Cnattingius S, *et al.* A comparative study of educational inequality in the risk of stillbirth in Denmark, Finland, Norway and Sweden 1981–2000. *J Epidemiol Community Health* 2012;**66**:240–6. doi:10.1136/jech.2009.101188
- 2 Arntzen A, Nybo Andersen AM. Social determinants for infant mortality in the Nordic countries, 1980–2001. *Scand J Public Health* 2004;**32**:381–9. doi:10.1080/14034940410029450
- 3 Petersen CB, Mortensen LH, Morgen CS, *et al.* Socio-economic inequality in preterm birth: a comparative study of the Nordic countries from 1981 to 2000. *Paediatr Perinat Epidemiol* 2009;**23**:66–75. doi:10.1111/j.1365-3016.2008.00977.x
- 4 Mortensen LH, Helweg-Larsen K, Nybo Andersen A-M. Socioeconomic differences in perinatal health and disease. *Scand J Public Health* 2011;**39**:110–4. doi:10.1177/1403494811405096
- 5 Räisänen S, Sankilampi U, Gissler M, *et al.* Smoking cessation in the first trimester reduces most obstetric risks, but not the risks of major congenital anomalies and admission to neonatal care: a population-based cohort study of 1 164 953 singleton pregnancies in Finland. *J Epidemiol Community Health* 2014;**68**:159–64. doi:10.1136/jech-2013-202991
- 6 Olesen C, Thrane N, Rønholt A-M, *et al.* Association between social position and congenital anomalies: A population-based study among 19,874 Danish women. *Scand J Soc Med* 2009;**37**:246–51. doi:10.1177/1403494808100938
- 7 Morales-Suarez Varela MM, Nohr EA, Llopis-Gonzalez A, *et al.* Socio-occupational status and congenital anomalies. *Eur J Public Health* 2009;**19**:161–7. doi:10.1093/eurpub/ckp003
- 8 Morales-Suárez-Varela M, Kaerlev L, Jin Liang Zhu, *et al.* Unemployment and pregnancy outcomes: A study within the Danish National Birth Cohort. *Scand J Soc Med* 2011;**39**:449–56. doi:10.1177/1403494811407672
- 9 Piketty T, Goldhammer A. *Capital in the twenty-first century*. Cambridge Massachusetts: : The Belknap Press of Harvard University Press 2014.
- 10 OECD. An overview of growing income inequalities in OECD countries: Main Findings. *Divid We Stand Why Inequal Keeps Rising* 2011;:25:21-45.
- 11 Statistics Denmark. *Indkomster 2011*. Denmark: : Statistics Denmark 2013.
- 12 Fall CHD. Fetal Programming and the Risk of Noncommunicable Disease. *Indian J Pediatr* 2013;**80**:13–20. doi:10.1007/s12098-012-0834-5
- 13 Gluckman PD, Hanson MA, Cooper C, *et al.* Effect of In Utero and Early-Life Conditions on Adult Health and Disease. *N Engl J Med* 2008;**359**:61–73. doi:10.1056/NEJMra0708473
- 14 Lynch J, Kaplan G. Socioeconomic position. In: Berkman LF, Kawachi I, eds. *Social Epidemiology*. Oxford University Press 2000.



- 1  
2  
3  
4  
5  
6  
7  
8  
9  
10  
11  
12  
13  
14  
15  
16  
17  
18  
19  
20  
21  
22  
23  
24  
25  
26  
27  
28  
29  
30  
31  
32  
33  
34  
35  
36  
37  
38  
39  
40  
41  
42  
43  
44  
45  
46  
47  
48  
49  
50  
51  
52  
53  
54  
55  
56  
57  
58  
59  
60
- 15 Galobardes B, Shaw M, Lawlor DA, *et al.* Indicators of socioeconomic position (part 1). *J Epidemiol Community Health* 2006;**60**:7–12. doi:10.1136/jech.2004.023531
  - 16 Jensen VM, Rasmussen AW. Danish Education Registers. *Scand J Public Health* 2011;**39**:91–4. doi:10.1177/1403494810394715
  - 17 Bliddal M, Broe A, Pottegård A, *et al.* The Danish Medical Birth Register. *Eur J Epidemiol* 2018;**33**:27–36. doi:10.1007/s10654-018-0356-1
  - 18 Lynge E, Sandegaard JL, Rebolj M. The Danish National Patient Register. *Scand J Public Health* 2011;**39**:30–3. doi:10.1177/1403494811401482
  - 19 Helweg-Larsen K. The Danish Register of Causes of Death. *Scand J Public Health* 2011;**39**:26–9. doi:10.1177/1403494811399958
  - 20 Alexander G, Himes J, Kaufman R, *et al.* A united states national reference for fetal growth. *Obstet Gynecol* 1996;**87**:163–8. doi:10.1016/0029-7844(95)00386-X
  - 21 Marsál K, Persson P-H, Larsen T, *et al.* Intrauterine growth curves based on ultrasonically estimated foetal weights. *Acta Paediatr* 1996;**85**:843–8. doi:10.1111/j.1651-2227.1996.tb14164.x
  - 22 Eurocat. EUROCAT Guide 1.4 and Reference Documents (2013). <http://www.eurocat-network.eu/content/Full%20Guide%201%204.pdf>
  - 23 Gissler M, Rahkonen O, Arntzen A, *et al.* Trends in socioeconomic differences in Finnish perinatal health 1991–2006. *J Epidemiol Community Health* 2009;**63**:420–5. doi:10.1136/jech.2008.079921
  - 24 Mortensen LH, Lauridsen JT, Diderichsen F, *et al.* Income-related and educational inequality in small-for-gestational age and preterm birth in Denmark and Finland 1987–2003. *Scand J Public Health* 2010;**38**:40–5. doi:10.1177/1403494809353820
  - 25 Räisänen S, Gissler M, Sankilampi U, *et al.* Contribution of socioeconomic status to the risk of small for gestational age infants – a population-based study of 1,390,165 singleton live births in Finland. *Int J Equity Health* 2013;**12**:28. doi:10.1186/1475-9276-12-28
  - 26 Li X, Sundquist J, Sundquist K. Parental occupation and risk of small-for-gestational-age births: a nationwide epidemiological study in Sweden. *Hum Reprod* 2010;**25**:1044–50. doi:10.1093/humrep/deq004
  - 27 Mortensen LH, Diderichsen F, Arntzen A, *et al.* Social inequality in fetal growth: a comparative study of Denmark, Finland, Norway and Sweden in the period 1981–2000. *J Epidemiol Community Health* 2008;**62**:325–31. doi:10.1136/jech.2007.061473
  - 28 Gisselmann MD, Hemström Ö. The contribution of maternal working conditions to socio-economic inequalities in birth outcome. *Soc Sci Med* 2008;**66**:1297–309. doi:10.1016/j.socscimed.2007.11.036

- 1  
2  
3  
4  
5  
6  
7  
8  
9  
10  
11  
12  
13  
14  
15  
16  
17  
18  
19  
20  
21  
22  
23  
24  
25  
26  
27  
28  
29  
30  
31  
32  
33  
34  
35  
36  
37  
38  
39  
40  
41  
42  
43  
44  
45  
46  
47  
48  
49  
50  
51  
52  
53  
54  
55  
56  
57  
58  
59  
60
- 29 Thompson JMD, Irgens LM, Rasmussen S, *et al.* Secular trends in socio-economic status and the implications for preterm birth. *Paediatr Perinat Epidemiol* 2006;**20**:182–7. doi:10.1111/j.1365-3016.2006.00711.x
- 30 Morgen CS, Bjørk C, Andersen PK, *et al.* Socioeconomic position and the risk of preterm birth--a study within the Danish National Birth Cohort. *Int J Epidemiol* 2008;**37**:1109–20. doi:10.1093/ije/dyn112
- 31 Räisänen S, Gissler M, Saari J, *et al.* Contribution of risk factors to extremely, very and moderately preterm births - register-based analysis of 1,390,742 singleton births. *PLoS One* 2013;**8**:e60660. doi:10.1371/journal.pone.0060660
- 32 Carlsen F, Grytten J, Eskild A. Maternal education and risk of offspring death; changing patterns from 16 weeks of gestation until one year after birth. *Eur J Public Health* 2014;**24**:157–62. doi:10.1093/eurpub/ckt065
- 33 Högberg L, Cnattingius S. The influence of maternal smoking habits on the risk of subsequent stillbirth: is there a causal relation? *BJOG Int J Obstet Gynaecol* 2007;**114**:699–704. doi:10.1111/j.1471-0528.2007.01340.x
- 34 Kesmodel U, Wisborg K, Olsen SF, *et al.* Moderate alcohol intake during pregnancy and the risk of stillbirth and death in the first year of life. *Am J Epidemiol* 2002;**155**:305–12.
- 35 Arntzen A, Mortensen L, Schnor O, *et al.* Neonatal and postneonatal mortality by maternal education--a population-based study of trends in the Nordic countries, 1981-2000. *Eur J Public Health* 2008;**18**:245–51. doi:10.1093/eurpub/ckm125
- 36 Arntzen A, Samuelsen SO, Bakketeig LS, *et al.* Socioeconomic status and risk of infant death. A population-based study of trends in Norway, 1967-1998. *Int J Epidemiol* 2004;**33**:279–88. doi:10.1093/ije/dyh054
- 37 Gisselmann MD. Education, infant mortality, and low birth weight in Sweden 1973-1990: emergence of the low birth weight paradox. *Scand J Public Health* 2005;**33**:65–71. doi:10.1080/14034940410028352
- 38 Johansson S, Villamor E, Altman M, *et al.* Maternal overweight and obesity in early pregnancy and risk of infant mortality: a population based cohort study in Sweden. *BMJ* 2014;**349**:g6572–g6572. doi:10.1136/bmj.g6572
- 39 Højkvalitetsvariable.  
<http://www.dst.dk/da/TilSalg/Forskningservice/Dokumentation/hoekvalitetsvariable> (accessed 20 May 2015).
- 40 Wilcox AJ. *Fertility and pregnancy: an epidemiologic perspective*. Oxford ; New York: : Oxford University Press 2010.
- 41 Mortensen LH, Diderichsen F, Davey Smith G, *et al.* Time is on whose side? Time trends in the association between maternal social disadvantage and offspring fetal growth. A study of 1 409 339 births in Denmark, 1981-2004. *J Epidemiol Community Health* 2009;**63**:281–5. doi:10.1136/jech.2008.076364

42 Illemann Christensen A, Statens Institut for Folkesundhed. *Sundhed og sygelighed i Danmark 2010 & udviklingen siden 1987*. Statens Institut for Folkesundhed 2012.

1  
2  
3  
4  
5  
6  
7  
8  
9  
10  
11  
12  
13  
14  
15  
16  
17  
18  
19  
20  
21  
22  
23  
24  
25  
26  
27  
28  
29  
30  
31  
32  
33  
34  
35  
36  
37  
38  
39  
40  
41  
42  
43  
44  
45  
46  
47  
48  
49  
50  
51  
52  
53  
54  
55  
56  
57  
58  
59  
60

For peer review only

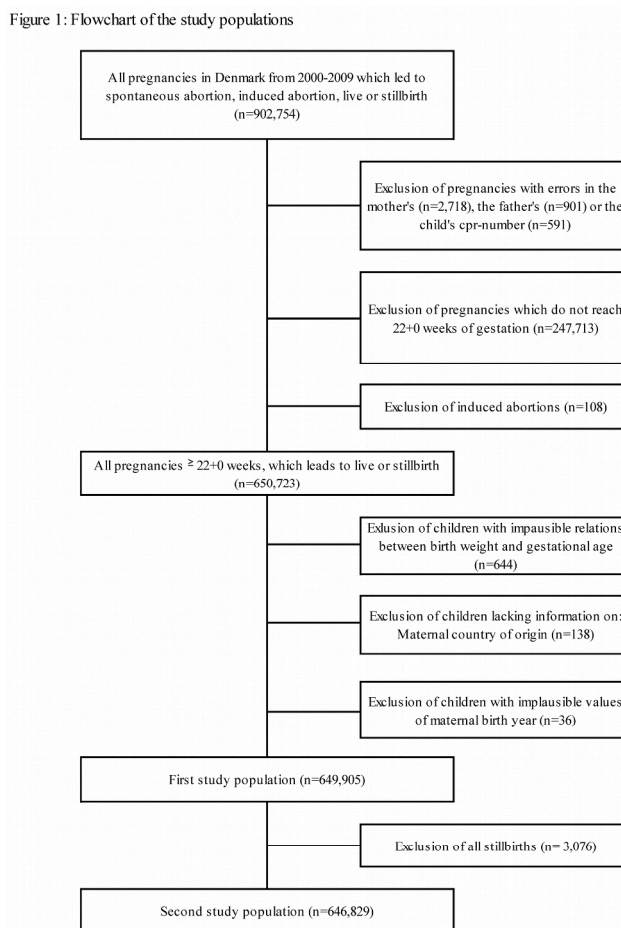

Figure 1 Flow chart

209x297mm (300 x 300 DPI)

**STROBE 2007 (v4) Statement—Checklist of items that should be included in reports of cohort studies**

| Section/Topic             | Item # | Recommendation                                                                                                                                                                       | Reported on page # |
|---------------------------|--------|--------------------------------------------------------------------------------------------------------------------------------------------------------------------------------------|--------------------|
| Title and abstract        | 1      | (a) Indicate the study’s design with a commonly used term in the title or the abstract                                                                                               | 2                  |
|                           |        | (b) Provide in the abstract an informative and balanced summary of what was done and what was found                                                                                  | 2                  |
| <b>Introduction</b>       |        |                                                                                                                                                                                      |                    |
| Background/rationale      | 2      | Explain the scientific background and rationale for the investigation being reported                                                                                                 | 4                  |
| Objectives                | 3      | State specific objectives, including any prespecified hypotheses                                                                                                                     | 4                  |
| <b>Methods</b>            |        |                                                                                                                                                                                      |                    |
| Study design              | 4      | Present key elements of study design early in the paper                                                                                                                              | 5                  |
| Setting                   | 5      | Describe the setting, locations, and relevant dates, including periods of recruitment, exposure, follow-up, and data collection                                                      | 5                  |
| Participants              | 6      | (a) Give the eligibility criteria, and the sources and methods of selection of participants. Describe methods of follow-up                                                           | 5                  |
|                           |        | (b) For matched studies, give matching criteria and number of exposed and unexposed                                                                                                  |                    |
| Variables                 | 7      | Clearly define all outcomes, exposures, predictors, potential confounders, and effect modifiers. Give diagnostic criteria, if applicable                                             | 5-6                |
| Data sources/ measurement | 8*     | For each variable of interest, give sources of data and details of methods of assessment (measurement). Describe comparability of assessment methods if there is more than one group |                    |
| Bias                      | 9      | Describe any efforts to address potential sources of bias                                                                                                                            | -                  |
| Study size                | 10     | Explain how the study size was arrived at                                                                                                                                            | 5 + Figure 1       |
| Quantitative variables    | 11     | Explain how quantitative variables were handled in the analyses. If applicable, describe which groupings were chosen and why                                                         |                    |
| Statistical methods       | 12     | (a) Describe all statistical methods, including those used to control for confounding                                                                                                | 6-7                |
|                           |        | (b) Describe any methods used to examine subgroups and interactions                                                                                                                  | -                  |
|                           |        | (c) Explain how missing data were addressed                                                                                                                                          | 5-7                |
|                           |        | (d) If applicable, explain how loss to follow-up was addressed                                                                                                                       | -                  |
|                           |        | (e) Describe any sensitivity analyses                                                                                                                                                | 7                  |
| <b>Results</b>            |        |                                                                                                                                                                                      |                    |

|                          |     |                                                                                                                                                                                                              |                 |
|--------------------------|-----|--------------------------------------------------------------------------------------------------------------------------------------------------------------------------------------------------------------|-----------------|
| Participants             | 13* | (a) Report numbers of individuals at each stage of study—eg numbers potentially eligible, examined for eligibility, confirmed eligible, included in the study, completing follow-up, and analysed            | 5-7 + Figure 1  |
|                          |     | (b) Give reasons for non-participation at each stage                                                                                                                                                         | N/A             |
|                          |     | (c) Consider use of a flow diagram                                                                                                                                                                           | Figure 1        |
| Descriptive data         | 14* | (a) Give characteristics of study participants (eg demographic, clinical, social) and information on exposures and potential confounders                                                                     | Table 1, pp 7-8 |
|                          |     | (b) Indicate number of participants with missing data for each variable of interest                                                                                                                          | Figure 1        |
|                          |     | (c) Summarise follow-up time (eg, average and total amount)                                                                                                                                                  | N/A             |
| Outcome data             | 15* | Report numbers of outcome events or summary measures over time                                                                                                                                               | Table 2 pp 8-9  |
| Main results             | 16  | (a) Give unadjusted estimates and, if applicable, confounder-adjusted estimates and their precision (eg, 95% confidence interval). Make clear which confounders were adjusted for and why they were included | Table 3 pp 9-10 |
|                          |     | (b) Report category boundaries when continuous variables were categorized                                                                                                                                    | 5-8             |
|                          |     | (c) If relevant, consider translating estimates of relative risk into absolute risk for a meaningful time period                                                                                             | Considered      |
| Other analyses           | 17  | Report other analyses done—eg analyses of subgroups and interactions, and sensitivity analyses                                                                                                               | 7               |
| <b>Discussion</b>        |     |                                                                                                                                                                                                              |                 |
| Key results              | 18  | Summarise key results with reference to study objectives                                                                                                                                                     | 10              |
| <b>Limitations</b>       |     |                                                                                                                                                                                                              |                 |
| Interpretation           | 20  | Give a cautious overall interpretation of results considering objectives, limitations, multiplicity of analyses, results from similar studies, and other relevant evidence                                   | 10-12           |
| Generalisability         | 21  | Discuss the generalisability (external validity) of the study results                                                                                                                                        | 11              |
| <b>Other information</b> |     |                                                                                                                                                                                                              |                 |
| Funding                  | 22  | Give the source of funding and the role of the funders for the present study and, if applicable, for the original study on which the present article is based                                                | 13              |

\*Give information separately for cases and controls in case-control studies and, if applicable, for exposed and unexposed groups in cohort and cross-sectional studies.

**Note:** An Explanation and Elaboration article discusses each checklist item and gives methodological background and published examples of transparent reporting. The STROBE checklist is best used in conjunction with this article (freely available on the Web sites of PLoS Medicine at <http://www.plosmedicine.org/>, Annals of Internal Medicine at <http://www.annals.org/>, and Epidemiology at <http://www.epidem.com/>). Information on the STROBE Initiative is available at [www.strobe-statement.org](http://www.strobe-statement.org).

# BMJ Open

## Educational disparities in perinatal health in Denmark in the first decade of the 21st century: A register-based cohort study

|                                 |                                                                                                                                                                                                                                                                                                                                                                                          |
|---------------------------------|------------------------------------------------------------------------------------------------------------------------------------------------------------------------------------------------------------------------------------------------------------------------------------------------------------------------------------------------------------------------------------------|
| Journal:                        | <i>BMJ Open</i>                                                                                                                                                                                                                                                                                                                                                                          |
| Manuscript ID                   | bmjopen-2018-023531.R1                                                                                                                                                                                                                                                                                                                                                                   |
| Article Type:                   | Research                                                                                                                                                                                                                                                                                                                                                                                 |
| Date Submitted by the Author:   | 13-Jul-2018                                                                                                                                                                                                                                                                                                                                                                              |
| Complete List of Authors:       | Bilsteen, Josephine; Department of Public Health, University of Copenhagen<br>Andresen, Josefine; Department of Public Health, University of Copenhagen<br>Mortensen, Laust; Department of Public Health, University of Copenhagen<br>Hansen, Anne; Department of Public Health, University of Copenhagen<br>Andersen, Anne-Marie; Department of Public Health, University of Copenhagen |
| <b>Primary Subject Heading</b>: | Epidemiology                                                                                                                                                                                                                                                                                                                                                                             |
| Secondary Subject Heading:      | Obstetrics and gynaecology, Paediatrics                                                                                                                                                                                                                                                                                                                                                  |
| Keywords:                       | Health inequalities, Congenital anomalies, Preterm birth, Small-for-gestational age, Stillbirth, Infant mortality                                                                                                                                                                                                                                                                        |
|                                 |                                                                                                                                                                                                                                                                                                                                                                                          |

SCHOLARONE™  
Manuscripts

Only

1 **Educational disparities in perinatal health in Denmark in the first decade of the 21<sup>st</sup> century: A**  
2  
3 **register-based cohort study**  
4

5  
6  
7 Josephine Funck Bilsteen<sup>1\*</sup>, [jfbi@sund.ku.dk](mailto:jfbi@sund.ku.dk)

8  
9 Josefine Bernhard Andresen<sup>1</sup>, [vln522@alumni.ku.dk](mailto:vln522@alumni.ku.dk)

10  
11 Laust Hvas Mortensen<sup>1</sup> [lamo@sund.ku.dk](mailto:lamo@sund.ku.dk)

12  
13 Anne Vinkel Hansen<sup>1</sup> [avih@sund.ku.dk](mailto:avih@sund.ku.dk)

14  
15 Anne-Marie Nybo Andersen<sup>1</sup> [amny@sund.ku.dk](mailto:amny@sund.ku.dk)

16  
17  
18  
19  
20 <sup>1</sup> Section of Social Medicine, Department of Public Health, University of Copenhagen, Copenhagen,  
21  
22 Denmark  
23

24  
25  
26 \* Corresponding author.

27  
28 Section of Social Medicine, Department of Public Health, University of Copenhagen,  
29  
30 Øster Farimagsgade 5, 1014 Copenhagen K, Denmark.

31  
32 Email: [jfbi@sund.ku.dk](mailto:jfbi@sund.ku.dk), telephone: +4541661381

33  
34  
35  
36  
37 Word count: 5,575  
38  
39  
40  
41  
42  
43  
44  
45  
46  
47  
48  
49  
50  
51  
52  
53  
54  
55  
56  
57  
58  
59  
60



## ABSTRACT

**Objective:** To investigate socioeconomic differences in six perinatal health outcomes in Denmark in the first decade of the 21<sup>st</sup> century.

**Design:** A population-based cohort study.

**Setting:** Danish national registries.

**Participants:** A total of 646,829 live born children and 3,076 stillborn children ( $\geq 22+0$  weeks of gestation) born in Denmark from 2000 through 2009. We excluded children with implausible relations between birth weight and gestational age ( $n=644$ ), children without information on maternal country of origin ( $n=138$ ), and implausible values of maternal year of birth ( $n=36$ ).

**Main outcome measures:** We investigated the following perinatal health outcomes: Stillbirth, neonatal and post-neonatal mortality, small-for-gestational age, preterm birth graded into moderate preterm, very preterm, and extremely preterm, and congenital anomalies registered in the first year of life.

**Results:** Maternal educational level was inversely associated with all adverse perinatal outcomes. For all examined outcomes the risk association displayed a clear gradient across the educational levels. The associations remained after adjustment for maternal age, maternal country of origin and calendar year. Compared to mothers with vocational education mothers with more than 15 years of education had an adjusted risk ratio for stillbirth of 0.64 [95% CI 0.56-0.72]. The corresponding adjusted risk ratios for neonatal mortality, post-neonatal mortality, congenital anomalies, moderate preterm birth, and small-for-gestational age were, respectively, 0.79 [95% CI 0.67-0.93], 0.57 [95% CI 0.41-0.78], 0.87 [95% CI 0.83-0.91], 0.80 [95% CI 0.77-0.83] and 0.83 [95% CI 0.81-0.85].

**Conclusion:** Substantial educational inequalities in perinatal health were still present in the Denmark in first decade of the 21<sup>st</sup> century.

**Keywords:** Health inequalities; Stillbirth, Infant mortality; Congenital anomalies; Preterm birth; Small-for-gestational age.

## ARTICLE SUMMARY

### Strengths and limitations of this study

- Danish national registries with high degree of completeness and quality were used in this study.
- The large study population enabled investigation of rare perinatal outcomes.
- The grading of maternal education into five categories enabled detailed investigation of the educational gradients.
- Congenital anomalies are not registered for stillbirths and spontaneous abortions during the study period and as a consequence we could only estimate risk among live born children.

## INTRODUCTION

The Nordic countries are generally regarded as egalitarian and have a low prevalence of adverse perinatal outcomes. However in the 1980s and 1990s strong socioeconomic gradients in adverse perinatal outcomes were observed in Denmark, Finland, Norway and Sweden. Several studies documented socioeconomic inequalities in respectively stillbirth, preterm birth, birth weight, infant mortality in all of the Nordic countries[1–4] but studies have been inconclusive with regards to congenital anomalies.[5–8]

During the first decade of the 21<sup>st</sup> century economic inequality rose in Denmark and elsewhere[9–11], but it is unclear what impact this has had on inequalities in perinatal health. Perinatal health measures, such as infant mortality, are used internationally as indicators of population health status. In addition, perinatal outcomes such as preterm birth and foetal growth are predictive at the individual level for health later in life. Several studies have found that low birth weight is related to the risk of chronic diseases in adulthood, such as type 2 diabetes and cardiovascular disease.[12,13] The health condition of the mother affects perinatal outcomes, thereby transferring socioeconomic inequality in health from one generation to the next.[13]

Socioeconomic position refers to the economic and social indicators that influence what positions individuals or groups hold within the structure of a society.[14] In this study educational level has been chosen as a measure of socioeconomic position because education is a favourable indicator of socioeconomic position in early adult life. Furthermore education is associated to future occupational status and income.[15]

The aim of this study was to describe the associations between maternal educational level and risk of adverse perinatal outcomes in Denmark during the first decade of the 21<sup>st</sup> century. The adverse perinatal outcomes of interest in this study were stillbirth, preterm birth, small-for-gestational age (SGA), congenital anomalies, neonatal mortality and post-neonatal mortality.

## METHODS

We did a longitudinal register linkage study of all live births and stillbirths in Denmark from 2000 through 2009, as recorded in the Danish Medical Birth Register. Information on maternal educational level from the Population's Education register[16] was linked to information on perinatal health outcomes from the Danish Medical Birth Register[17], the Danish National Patient Register[18], and the Danish Register of Causes of Death [19]. The Danish system of unique person identifiers (CPR-number) was used to link individuals across the different registers in an anonymised data set in Statistics Denmark, which could be assessed via a VPN connection from Department of Public Health, University of Copenhagen. According to Danish legislation no ethical permission is required for register-based research; however, the study was approved by the local data protection authorities.

### Study populations

The study population consisted of all live born and stillborn children born in Denmark during the study period. Children were excluded from the study population as illustrated in Figure 1. Children whose mothers were born after 1999 were excluded. Furthermore, we excluded children with implausible relations between gestational age and birth weight defined according to the method described by Alexander et al.[20] After the exclusions Analysis Population 1 consisted of a total of 649,905 live and stillborn children. Analysis population 2 consisted of 646,829 live born when stillborn children were excluded from Analysis Population 1. In the analysis of SGA children missing information on birth weight (n=4388) were not included.

### Patient and Public Involvement

As this is a whole population register-based study we did not recruit individuals. Patients and public were not involved in development of the research question, the design, or conduct of this study. We planned to disseminate the results of this study through open access publication.

### Study variables

1 The main exposure variable of interest was maternal educational level, defined as the highest educational  
2 level attained or expected (based on ongoing education) of the mother at the year of birth categorized into  
3 five categories: Primary education ( $\leq 9$  years), secondary education (high school *10-12 years*), vocational  
4 education (*10-12 years*), short- and medium-cycle higher education (*12-15 years*), long-cycle higher  
5 education ( $>15$  years), and missing. Since the education register is based on reports from Danish  
6 educational institutions, the category of missing is comprised of individuals who are not registered at any  
7 education in Denmark.  
8  
9

10 Information on birth weight and the outcomes preterm birth and stillbirth were obtained from the Medical  
11 Birth Register. SGA was defined as birth weight falling below the 10th percentile of birth weight  
12 according to sex-specific intrauterine growth curves presented by Marsàl et al.[21] Preterm birth was  
13 divided into extremely preterm birth defined as birth  $\geq 22+0 - 27+6$  weeks, very preterm birth defined as  
14 birth  $\geq 28+0 - 31+6$ , and moderately preterm birth defined as birth  $\geq 32+0 - 36+6$ . The variable stillbirth  
15 was defined as foetal death at or after 22 completed gestational weeks. In Denmark, the threshold between  
16 spontaneous abortions and stillbirths was changed in 2004 from 28 completed weeks of gestation to 22  
17 completed weeks of gestation. All pregnancies from 2000 to 2003 for which a spontaneous abortion was  
18 registered after 22 completed weeks of gestation were recoded into stillbirths. Information on infant  
19 mortality was obtained from The Central Person Register and The Danish Register of Causes of Death.  
20 Neonatal mortality was defined as death of a live born child before or at day 27 after birth and post-  
21 neonatal mortality was defined as death of a live born child at or after day 28 through day 365 after birth.  
22 Information on congenital anomalies was obtained from the Danish National Patient Register. The  
23 variable congenital anomalies registered in first year of life were defined according to EuroCAT's  
24 definitions excluding minor anomalies according to EuroCAT criteria.[22]  
25  
26  
27  
28  
29  
30  
31  
32  
33  
34  
35  
36  
37  
38  
39  
40  
41  
42  
43  
44  
45  
46  
47  
48  
49

50 Other potential confounders in the analysis were the maternal year of birth (*<1965, 1965-69, 1970-74,*  
51 *1975-79,  $\geq 1980$*  maternal age at the time of delivery (*<25 years, 25-29 years, 30-34 years, 35-39 years,*  
52  *$\geq 40$  years*), Offspring's year of birth (*2000-01, 2002-03, 2004-05, 2006-07, 2008-09*), and country of  
53 origin of the mother categorized as Denmark, "Other western country" (*Andorra, Australia, Canada,*  
54  
55  
56  
57  
58  
59

Iceland, Liechtenstein, Monaco, New Zealand, Norway, San Marino, Switzerland, United States of America, Vatican City State and all EU member countries except Denmark) or “Non-western country” (all remaining countries).

## Statistics

Initially, we calculated the prevalence for the six perinatal outcomes by maternal educational level. To investigate the associations between maternal educational level and the perinatal outcomes we used multiple logistic regression analyses and the analysis populations were restricted to children with information on maternal educational level. The a priori chosen model for adjustment included the covariates maternal age, maternal country of origin, and maternal year of birth as these were considered potential confounders. The variable year of birth of the offspring was not included in the model since the variables maternal age at time of delivery and maternal year of birth in combination practically describe the variable. Unadjusted and adjusted risk ratios (RR) were presented with a 95% confidence interval. Additionally, we fitted two models to test robustness of the findings: one adjusted for maternal age only and the second including maternal age, parity and country of origin, and year of birth as covariates. However, since the findings from the two models fitted to test robustness were similar to findings from the other adjusted model their findings are not shown. All statistical analyses were conducted in SAS 9.4.

## RESULTS

The distributions of maternal educational level by maternal age, maternal country of origin and calendar year of birth are presented in Table 1. In Denmark, maternal completed and on-going educational level increased during the study period as shown in Table 1. The proportion of mothers born outside Denmark was higher among mothers with missing educational level.

**Table 1 Maternal age, year of birth, and country of origin, and offspring’s year of birth by educational level, all children born in Denmark 2000-2009**

|  | All children | Primary education | Vocational education | Secondary education | Short and medium-cycle higher education | Long-cycle higher education | Missing  |
|--|--------------|-------------------|----------------------|---------------------|-----------------------------------------|-----------------------------|----------|
|  | n=649,905    | n=106,129         | n=222,744            | n=46,026            | n=185,417                               | n=94,168                    | n=15,421 |

|                                   | %    | %    | %    | %    | %    | %    | %    |
|-----------------------------------|------|------|------|------|------|------|------|
| <b>Maternal age</b>               |      |      |      |      |      |      |      |
| <25                               | 12.3 | 32.6 | 12.2 | 17.8 | 3.8  | 2.3  | 20.0 |
| 25-29                             | 33.5 | 30.9 | 37.4 | 31.2 | 25.4 | 26.2 | 34.6 |
| 30-34                             | 36.3 | 23.0 | 34.5 | 32.6 | 42.1 | 46.9 | 28.0 |
| 35-39                             | 15.3 | 11.0 | 13.8 | 15.8 | 16.4 | 21.1 | 14.0 |
| ≥40                               | 2.6  | 2.4  | 2.1  | 2.6  | 2.7  | 3.5  | 3.4  |
| <b>Maternal year of birth</b>     |      |      |      |      |      |      |      |
| <1965                             | 4.2  | 4.1  | 3.8  | 4.6  | 4.3  | 4.8  | 4.5  |
| 1965-69                           | 16.5 | 12.3 | 16.4 | 17.6 | 17.0 | 20.7 | 12.6 |
| 1970-74                           | 33.5 | 24.0 | 33.0 | 32.4 | 37.6 | 39.6 | 24.2 |
| 1975-79                           | 30.6 | 28.8 | 32.0 | 27.9 | 31.8 | 28.3 | 31.1 |
| ≥1980                             | 15.2 | 30.8 | 14.8 | 17.6 | 9.8  | 6.7  | 27.7 |
| <b>Maternal country of origin</b> |      |      |      |      |      |      |      |
| Denmark                           | 86.2 | 74.7 | 91.0 | 77.6 | 93.2 | 92.0 | 10.7 |
| Western countries                 | 3.1  | 1.3  | 1.9  | 3.8  | 2.6  | 4.3  | 26.3 |
| Non-western countries             | 10.7 | 24.0 | 7.2  | 18.6 | 4.3  | 3.7  | 63.0 |
| <b>Year of birth (offspring)</b>  |      |      |      |      |      |      |      |
| 2000-2001                         | 20.5 | 24.2 | 22.3 | 23.7 | 17.9 | 16.0 | 20.2 |
| 2002-2003                         | 19.9 | 21.1 | 20.9 | 22.1 | 18.8 | 18.0 | 14.9 |
| 2004-2005                         | 20.0 | 19.6 | 20.1 | 20.1 | 20.6 | 20.0 | 12.6 |
| 2006-2007                         | 20.0 | 18.0 | 19.1 | 18.2 | 21.5 | 22.2 | 21.0 |
| 2008-2009                         | 19.7 | 17.1 | 17.7 | 15.9 | 21.2 | 23.8 | 31.3 |

The prevalence of stillbirth, neonatal mortality, post-neonatal mortality, congenital anomalies, SGA, and three degrees of preterm birth, respectively, by maternal educational level are shown in Table 2. Women with the shortest education had a higher prevalence of all of the adverse perinatal outcomes compared to women with higher educational level. The group of women with unknown educational level had the highest prevalence of stillbirth and SGA compared to the women with known educational level.

**Table 2 Prevalence of adverse perinatal outcome by educational level, Denmark, 2000-2009**

|                             | Stillbirth | Neonatal mortality | Post-neonatal mortality | Congenital anomalies | SGA      | Moderate preterm birth<br>32+0-36+6 | Very preterm birth<br>28+0-31+6 | Extreme preterm birth<br><28+0 |
|-----------------------------|------------|--------------------|-------------------------|----------------------|----------|-------------------------------------|---------------------------------|--------------------------------|
|                             | n=3,076    | n=1,688            | n=648                   | n=19,449             | n=59,979 | n=36,610                            | n=4,670                         | n=1,843                        |
|                             | Per 1000   | Per 1000           | Per 1000                | Per 1000             | Per 1000 | Per 1000                            | Per 1000                        | Per 1000                       |
| <b>Primary education</b>    | 6.7        | 3.6                | 1.9                     | 34.9                 | 125.9    | 64.5                                | 8.3                             | 4.1                            |
| <b>Vocational education</b> | 4.8        | 2.7                | 1.0                     | 30.7                 | 95.1     | 60.0                                | 7.8                             | 3.0                            |
| <b>Secondary education</b>  | 4.0        | 2.5                | 1.0                     | 28.2                 | 94.2     | 52.7                                | 7.0                             | 2.4                            |
| <b>Short and medium-</b>    | 4.3        | 2.2                | 0.7                     | 28.7                 | 77.9     | 53.7                                | 6.6                             | 2.3                            |
| <b>Long-cycle higher</b>    | 3.1        | 2.1                | 0.5                     | 27.1                 | 77.9     | 48.8                                | 6.3                             | 2.4                            |
| <b>Missing</b>              | 7.1        | 3.0                | 1.2                     | 28.9                 | 126.5    | 51.2                                | 5.9                             | 3.1                            |

Table 3 shows the relative risks, expressed as adjusted and unadjusted RR, of respectively stillbirth, neonatal mortality, post-neonatal mortality, congenital anomalies, SGA, and moderately preterm birth, very preterm birth, and extremely preterm birth, with mothers with vocational education as the comparison group. Compared to mothers with vocational education mothers with primary education had a statistically significant increased RR for stillbirth, neonatal mortality, post-neonatal mortality, congenital anomalies, moderate preterm birth, very preterm birth, extreme preterm birth and SGA. Women with short and medium-cycle higher education and women with long-cycle higher education had a statistically significant lower risk of all the six perinatal outcomes compared to women with vocational education. These results indicated consistently inverse educational gradients in the risk of adverse perinatal outcomes. The gradients were consistent after adjusting for maternal age, maternal country of origin and calendar year. The estimates were almost identical in analyses with adjustment for maternal age only and with adjustment for maternal age, maternal country of origin, calendar year and parity (results not shown).

**Table 3 Adverse perinatal outcome by maternal educational level, all births Denmark, 2000-2009**

|                                                     | RR   | 95 % CI   | aRR  | 95 % CI   |
|-----------------------------------------------------|------|-----------|------|-----------|
| <b>Stillbirth</b>                                   |      |           |      |           |
| Primary education                                   | 1.39 | 1.26-1.53 | 1.34 | 1.21-1.48 |
| Vocational education                                | 1.00 |           | 1.00 |           |
| Secondary education                                 | 0.84 | 0.71-0.98 | 0.81 | 0.69-0.94 |
| Short and medium-cycle higher education             | 0.89 | 0.81-0.97 | 0.89 | 0.81-0.98 |
| Long-cycle higher education                         | 0.65 | 0.57-0.74 | 0.64 | 0.56-0.72 |
| <b>Neonatal mortality</b>                           |      |           |      |           |
| Primary education                                   | 1.33 | 1.16-1.51 | 1.29 | 1.12-1.47 |
| Vocational education                                | 1.00 |           | 1.00 |           |
| Secondary education                                 | 0.92 | 0.76-1.13 | 0.90 | 0.73-1.10 |
| Short and medium-cycle higher education             | 0.79 | 0.70-0.90 | 0.80 | 0.71-0.92 |
| Long-cycle higher education                         | 0.79 | 0.67-0.93 | 0.79 | 0.67-0.93 |
| <b>Post-neonatal mortality<sup>a</sup></b>          |      |           |      |           |
| Primary education                                   | 1.93 | 1.59-2.35 | 1.81 | 1.47-2.22 |
| Vocational education                                | 1.00 |           | 1.00 |           |
| Secondary education                                 | 1.02 | 0.74-1.41 | 0.98 | 0.71-1.36 |
| Short and medium-cycle higher education             | 0.74 | 0.59-0.92 | 0.76 | 0.61-0.95 |
| Long-cycle higher education                         | 0.55 | 0.41-0.75 | 0.57 | 0.42-0.78 |
| <b>Congenital anomalies</b>                         |      |           |      |           |
| Primary education                                   | 1.14 | 1.09-1.18 | 1.13 | 1.08-1.18 |
| Vocational education                                | 1.00 |           | 1.00 |           |
| Secondary education                                 | 0.92 | 0.86-0.98 | 0.91 | 0.86-0.97 |
| Short and medium-cycle higher education             | 0.94 | 0.90-0.97 | 0.93 | 0.90-0.97 |
| Long-cycle higher education                         | 0.88 | 0.84-0.92 | 0.87 | 0.83-0.91 |
| <b>Moderate preterm birth 32+0-36+6<sup>b</sup></b> |      |           |      |           |
| Primary education                                   | 1.07 | 1.04-1.10 | 1.11 | 1.08-1.14 |
| Vocational education                                | 1.00 |           | 1.00 |           |
| Secondary education                                 | 0.88 | 0.84-0.92 | 0.89 | 0.86-0.93 |
| Short and medium-cycle higher education             | 0.89 | 0.87-0.92 | 0.89 | 0.86-0.91 |



|    |                                                   |      |           |      |           |
|----|---------------------------------------------------|------|-----------|------|-----------|
| 1  | Long-cycle higher education                       | 0.81 | 0.79-0.84 | 0.80 | 0.77-0.83 |
| 2  | <b>Very preterm birth 28+0-31+6<sup>b</sup></b>   |      |           |      |           |
| 3  | Primary education                                 | 1.06 | 0.98-1.15 | 1.10 | 1.01-1.20 |
| 4  | Vocational education                              | 1.00 |           | 1.00 |           |
| 5  | Secondary education                               | 0.89 | 0.79-1.01 | 0.91 | 0.81-1.03 |
| 6  | Short and medium-cycle higher education           | 0.83 | 0.77-0.90 | 0.82 | 0.76-0.89 |
| 7  | Long-cycle higher education                       | 0.80 | 0.73-0.88 | 0.78 | 0.71-0.86 |
| 8  | <b>Extreme preterm birth &lt;28+0<sup>b</sup></b> |      |           |      |           |
| 9  | Primary education                                 | 1.36 | 1.20-1.54 | 1.35 | 1.19-1.54 |
| 10 | Vocational education                              | 1.00 |           | 1.00 |           |
| 11 | Secondary education                               | 0.79 | 0.64-0.96 | 0.78 | 0.63-0.96 |
| 12 | Short and medium-cycle higher education           | 0.77 | 0.68-0.87 | 0.76 | 0.67-0.86 |
| 13 | Long-cycle higher education                       | 0.78 | 0.67-0.91 | 0.76 | 0.65-0.89 |
| 14 | <b>SGA</b>                                        |      |           |      |           |
| 15 | Primary education                                 | 1.32 | 1.30-1.35 | 1.25 | 1.22-1.28 |
| 16 | Vocational education                              | 1.00 |           | 1.00 |           |
| 17 | Secondary education                               | 0.99 | 0.96-1.02 | 0.96 | 0.93-0.99 |
| 18 | Short and medium-cycle higher education           | 0.82 | 0.80-0.84 | 0.83 | 0.82-0.85 |
| 19 | Long-cycle higher education                       | 0.82 | 0.80-0.84 | 0.83 | 0.81-0.85 |

RR: Crude risk ratio, aRR: Risk ratio adjusted for maternal age, maternal country of origin and calendar year.

<sup>a</sup>Compared to children who were alive 365 days after birth.

<sup>b</sup>Compared to children born from 37+0 - 41+6

## DISCUSSION

In a population register study of perinatal outcomes in Denmark we found consistent inverse educational gradients for all perinatal outcomes in the study period, with higher rates of adverse outcomes in children of women with lower educational levels. Adjustments for maternal age, country of origin, parity and calendar year did not change the gradients.

An educational gradient in SGA was found in this study. This result is consistent with previous Nordic studies, which have reported socioeconomic inequalities in SGA.[5,23–28] Socioeconomic differences have been found in preterm birth as an overall outcome[5,23,24,29] and in preterm birth categorised according to gestational age.[3,26,28,30,31] This study found an educational gradient in moderate, very and extremely preterm birth. Consistently with previous studies[32–34] an educational gradient was found in stillbirth in this study. This study observed educational gradients in neonatal and post-neonatal mortality. Socioeconomic inequalities have been found in earlier Nordic studies in neonatal mortality[28,32,35–38] and also in post-neonatal mortality.[32,35,36,38]

1 Previous Nordic studies that investigated the association between socioeconomic position and congenital  
2 anomalies reported inconsistent results.[5–8] In accordance with a previous Danish study[6] this study  
3  
4 anomalies reported inconsistent results.[5–8] In accordance with a previous Danish study[6] this study  
5  
6 found a statistically significant educational gradient in congenital anomalies. Both studies used maternal  
7  
8 educational level as a measure of socioeconomic position whereas the other studies used occupation[5,8]  
9  
10 or a combination of occupation and education[7]. The differences in findings regarding socioeconomic  
11  
12 differences in congenital anomalies are likely to be related to the use of different socioeconomic measures.  
13  
14  
15

16 We used population-covering register individual-based data with minimal sources of selection and  
17  
18 information bias. The data from the Danish Medical Birth Register used in this study are of high  
19  
20 quality.[17] The size of the study population enabled investigation of relatively rare perinatal outcomes  
21  
22 like post-neonatal mortality. Information on education was collected for administrative purposes, and  
23  
24 according to the documentation from Statistics Denmark the education variable was a so-called high  
25  
26 quality variable.[39] A limitation of this study is that the Danish registers only obtained information on  
27  
28 congenital anomalies for live births. The prevalence of congenital anomalies is presumably higher among  
29  
30 stillbirths, spontaneous and induced abortions than among live births.[40] Consequently, the  
31  
32 socioeconomic gradient in congenital anomalies observed in this study could be underestimated. In order  
33  
34 to understand the true association between socioeconomic position and congenital anomalies it is essential  
35  
36 to include information on congenital anomalies for live births, stillbirths, induced abortions and  
37  
38 spontaneous abortions.  
39  
40  
41  
42

43 In contrast to several previous studies we did not adjust for lifestyle factors such as smoking, alcohol  
44  
45 intake, BMI, and physical activity. In this study we were interested in estimating the overall effect of  
46  
47 maternal educational level on adverse perinatal outcome and as a consequence we did not adjust for  
48  
49 lifestyle factors as these were believed to mediate the association. It could be debated whether maternal  
50  
51 age is a mediator or a confounder in the association. In this study we assumed that maternal age affects  
52  
53 maternal education since young women have not had the opportunity to undergo as much education as  
54  
55 older women. As a consequence we considered maternal age a confounder. Both singletons and multiples  
56  
57  
58  
59

1 were included in the analyses as we do not think the associations between maternal education and the  
2  
3 adverse perinatal outcomes differ between singletons and multiples when the estimates are adjusted for  
4  
5 maternal age and other potential confounders.  
6  
7  
8  
9

10 The general level of education in Denmark increased during the study period. The proportion of women  
11 who attained primary school and no further education declined slightly during the study period. However,  
12 educational inequality in adverse perinatal outcomes was still observed. A contributing explanation of the  
13 inequality is likely to be found in a possible selection of women with the lowest educational level.[37] The  
14 group of women with primary education becomes more highly selected and thereby more socially  
15 vulnerable[41] and this may contribute to the higher risk of adverse perinatal outcomes. The educational  
16 distribution of mothers who give birth changes over time and also differs in the relatively similar Nordic  
17 Welfare states this should make generalizations to other cohorts difficult. Nevertheless, socioeconomic  
18 differences in perinatal outcomes has been observed in different countries and in different time periods[4].  
19  
20  
21  
22  
23  
24  
25  
26  
27  
28  
29  
30

31 Educational inequality in perinatal outcomes persists in the 21<sup>st</sup> century. A possible part of the explanation  
32 of this is an overall healthier lifestyle among women with higher socioeconomic position. Certain lifestyle  
33 risk factors are more common among lower socioeconomic groups than among higher socioeconomic  
34 groups. For instance the prevalence of smokers is highest among women with lower educational level in  
35 Denmark[42] and smoking is associated with a higher risk of several adverse perinatal outcomes.[40] To  
36 investigate the mediating factors between socioeconomic position and adverse perinatal outcomes was  
37 beyond the scope of this article. However, in order to reduce socioeconomic inequality in perinatal health  
38 future studies should focus on the mediating mechanisms in the association of socioeconomic position and  
39 adverse perinatal outcome  
40  
41  
42  
43  
44  
45  
46  
47  
48  
49  
50

## 51 52 53 **CONCLUSION**

54 Socioeconomic inequality in perinatal health was observed in Denmark in the first decade of the 21<sup>st</sup>  
55 century. Maternal educational gradients were evident in the rare but serious outcomes such as congenital  
56  
57  
58  
59  
60

1 anomalies and foetal and infant mortality. The socioeconomically patterned risk of preterm birth and  
2  
3 growth restriction is worrying because it may be the first tracks on the way to socioeconomic inequalities  
4  
5 in health later in life. Interventions to diminish socioeconomic inequality in the earliest phases of life are  
6  
7 still needed.  
8  
9

10  
11  
12 Figure 1: Flowchart of the study populations  
13  
14  
15

## 16 LIST OF ABBREVIATIONS

17  
18 SGA: Small-for-gestational age RR: Risk ratios  
19  
20  
21

## 22 DECLARATIONS

23  
24 **Ethics approval and consent to participate:** According to Danish legislation no ethical permission is  
25  
26 required for register-based research; however, the study was approved by the local data protection  
27  
28 authorities.  
29

30  
31 **Consent for publication:** Not applicable.  
32

33  
34 **Availability of data and material:** The data that support the findings of this study are available from  
35  
36 Statistics Denmark but restrictions apply to the availability of these data, which were used under license  
37  
38 for the current study, and so are not publicly available. Data are however available from the authors upon  
39  
40 reasonable request and with permission of Statistics Denmark.

41  
42 **Competing interests:** The authors declare that they have no competing interests  
43

44  
45 **Funding:** This project was partly supported by the NordForsk grant no. 75970 for the project Contingent  
46  
47 Life Courses.

48  
49 **Author contributions:** AMNA, JA and JB designed the study. JA and JB analysed the data with  
50  
51 assistance from AMNA, AVH and LM. JA and JB interpreted the data and prepared the first draft of the  
52  
53 manuscript, which was revised by AMNA, AVH and LM. All authors read and approved the final  
54  
55 manuscript.  
56  
57  
58  
59  
60

1 **Acknowledgments:** We would like to thank Professor David Taylor Robinson for his comments and  
2  
3 suggestions.  
4  
5  
6  
7  
8  
9  
10  
11  
12  
13  
14  
15  
16  
17  
18  
19  
20  
21  
22  
23  
24  
25  
26  
27  
28  
29  
30  
31  
32  
33  
34  
35  
36  
37  
38  
39  
40  
41  
42  
43  
44  
45  
46  
47  
48  
49  
50  
51  
52  
53  
54  
55  
56  
57  
58  
59  
60

For peer review only

1  
2  
3  
4  
5  
6  
7  
8  
9  
10  
11  
12  
13  
14  
15  
16  
17  
18  
19  
20  
21  
22  
23  
24  
25  
26  
27  
28  
29  
30  
31  
32  
33  
34  
35  
36  
37  
38  
39  
40  
41  
42  
43  
44  
45  
46  
47  
48  
49  
50  
51  
52  
53  
54  
55  
56  
57  
58  
59  
60  
**REFERENCES**

- 1 Rom AL, Mortensen LH, Cnattingius S, *et al.* A comparative study of educational inequality in the risk of stillbirth in Denmark, Finland, Norway and Sweden 1981–2000. *J Epidemiol Community Health* 2012;**66**:240–6. doi:10.1136/jech.2009.101188
- 2 Arntzen A, Nybo Andersen AM. Social determinants for infant mortality in the Nordic countries, 1980–2001. *Scand J Public Health* 2004;**32**:381–9. doi:10.1080/14034940410029450
- 3 Petersen CB, Mortensen LH, Morgen CS, *et al.* Socio-economic inequality in preterm birth: a comparative study of the Nordic countries from 1981 to 2000. *Paediatr Perinat Epidemiol* 2009;**23**:66–75. doi:10.1111/j.1365-3016.2008.00977.x
- 4 Mortensen LH, Helweg-Larsen K, Nybo Andersen A-M. Socioeconomic differences in perinatal health and disease. *Scand J Public Health* 2011;**39**:110–4. doi:10.1177/1403494811405096
- 5 Räisänen S, Sankilampi U, Gissler M, *et al.* Smoking cessation in the first trimester reduces most obstetric risks, but not the risks of major congenital anomalies and admission to neonatal care: a population-based cohort study of 1 164 953 singleton pregnancies in Finland. *J Epidemiol Community Health* 2014;**68**:159–64. doi:10.1136/jech-2013-202991
- 6 Olesen C, Thrane N, Rønholt A-M, *et al.* Association between social position and congenital anomalies: A population-based study among 19,874 Danish women. *Scand J Soc Med* 2009;**37**:246–51. doi:10.1177/1403494808100938
- 7 Morales-Suarez Varela MM, Nohr EA, Llopis-Gonzalez A, *et al.* Socio-occupational status and congenital anomalies. *Eur J Public Health* 2009;**19**:161–7. doi:10.1093/eurpub/ckp003
- 8 Morales-Suárez-Varela M, Kaerlev L, Jin Liang Zhu, *et al.* Unemployment and pregnancy outcomes: A study within the Danish National Birth Cohort. *Scand J Soc Med* 2011;**39**:449–56. doi:10.1177/1403494811407672
- 9 Piketty T, Goldhammer A. *Capital in the twenty-first century*. Cambridge Massachusetts: : The Belknap Press of Harvard University Press 2014.
- 10 OECD. An overview of growing income inequalities in OECD countries: Main Findings. *Divid We Stand Why Inequal Keeps Rising* 2011;:25:21-45.
- 11 Statistics Denmark. *Indkomster 2011*. Denmark: : Statistics Denmark 2013.
- 12 Fall CHD. Fetal Programming and the Risk of Noncommunicable Disease. *Indian J Pediatr* 2013;**80**:13–20. doi:10.1007/s12098-012-0834-5
- 13 Gluckman PD, Hanson MA, Cooper C, *et al.* Effect of In Utero and Early-Life Conditions on Adult Health and Disease. *N Engl J Med* 2008;**359**:61–73. doi:10.1056/NEJMra0708473
- 14 Lynch J, Kaplan G. Socioeconomic position. In: Berkman LF, Kawachi I, eds. *Social Epidemiology*. Oxford University Press 2000.

- 15 Galobardes B, Shaw M, Lawlor DA, *et al.* Indicators of socioeconomic position (part 1). *J Epidemiol Community Health* 2006;**60**:7–12. doi:10.1136/jech.2004.023531
- 16 Jensen VM, Rasmussen AW. Danish Education Registers. *Scand J Public Health* 2011;**39**:91–4. doi:10.1177/1403494810394715
- 17 Bliddal M, Broe A, Pottegård A, *et al.* The Danish Medical Birth Register. *Eur J Epidemiol* 2018;**33**:27–36. doi:10.1007/s10654-018-0356-1
- 18 Lynge E, Sandegaard JL, Rebolj M. The Danish National Patient Register. *Scand J Public Health* 2011;**39**:30–3. doi:10.1177/1403494811401482
- 19 Helweg-Larsen K. The Danish Register of Causes of Death. *Scand J Public Health* 2011;**39**:26–9. doi:10.1177/1403494811399958
- 20 Alexander G, Himes J, Kaufman R, *et al.* A united states national reference for fetal growth. *Obstet Gynecol* 1996;**87**:163–8. doi:10.1016/0029-7844(95)00386-X
- 21 Marsál K, Persson P-H, Larsen T, *et al.* Intrauterine growth curves based on ultrasonically estimated foetal weights. *Acta Paediatr* 1996;**85**:843–8. doi:10.1111/j.1651-2227.1996.tb14164.x
- 22 Eurocat. EUROCAT Guide 1.4 and Reference Documents (2013). <http://www.eurocat-network.eu/content/Full%20Guide%201%204.pdf>
- 23 Gissler M, Rahkonen O, Arntzen A, *et al.* Trends in socioeconomic differences in Finnish perinatal health 1991–2006. *J Epidemiol Community Health* 2009;**63**:420–5. doi:10.1136/jech.2008.079921
- 24 Mortensen LH, Lauridsen JT, Diderichsen F, *et al.* Income-related and educational inequality in small-for-gestational age and preterm birth in Denmark and Finland 1987–2003. *Scand J Public Health* 2010;**38**:40–5. doi:10.1177/1403494809353820
- 25 Räisänen S, Gissler M, Sankilampi U, *et al.* Contribution of socioeconomic status to the risk of small for gestational age infants – a population-based study of 1,390,165 singleton live births in Finland. *Int J Equity Health* 2013;**12**:28. doi:10.1186/1475-9276-12-28
- 26 Li X, Sundquist J, Sundquist K. Parental occupation and risk of small-for-gestational-age births: a nationwide epidemiological study in Sweden. *Hum Reprod* 2010;**25**:1044–50. doi:10.1093/humrep/deq004
- 27 Mortensen LH, Diderichsen F, Arntzen A, *et al.* Social inequality in fetal growth: a comparative study of Denmark, Finland, Norway and Sweden in the period 1981–2000. *J Epidemiol Community Health* 2008;**62**:325–31. doi:10.1136/jech.2007.061473
- 28 Gisselmann MD, Hemström Ö. The contribution of maternal working conditions to socio-economic inequalities in birth outcome. *Soc Sci Med* 2008;**66**:1297–309. doi:10.1016/j.socscimed.2007.11.036



- 1  
2 29 Thompson JMD, Irgens LM, Rasmussen S, *et al.* Secular trends in socio-economic status and  
3 the implications for preterm birth. *Paediatr Perinat Epidemiol* 2006;**20**:182–7.  
4 doi:10.1111/j.1365-3016.2006.00711.x  
5
- 6 30 Morgen CS, Bjørk C, Andersen PK, *et al.* Socioeconomic position and the risk of preterm  
7 birth--a study within the Danish National Birth Cohort. *Int J Epidemiol* 2008;**37**:1109–20.  
8 doi:10.1093/ije/dyn112  
9
- 10 31 Räisänen S, Gissler M, Saari J, *et al.* Contribution of risk factors to extremely, very and  
11 moderately preterm births - register-based analysis of 1,390,742 singleton births. *PloS One*  
12 2013;**8**:e60660. doi:10.1371/journal.pone.0060660  
13
- 14 32 Carlsen F, Grytten J, Eskild A. Maternal education and risk of offspring death; changing  
15 patterns from 16 weeks of gestation until one year after birth. *Eur J Public Health*  
16 2014;**24**:157–62. doi:10.1093/eurpub/ckt065  
17
- 18 33 Högberg L, Cnattingius S. The influence of maternal smoking habits on the risk of  
19 subsequent stillbirth: is there a causal relation? *BJOG Int J Obstet Gynaecol* 2007;**114**:699–  
20 704. doi:10.1111/j.1471-0528.2007.01340.x  
21
- 22 34 Kesmodel U, Wisborg K, Olsen SF, *et al.* Moderate alcohol intake during pregnancy and the  
23 risk of stillbirth and death in the first year of life. *Am J Epidemiol* 2002;**155**:305–12.  
24
- 25 35 Arntzen A, Mortensen L, Schnor O, *et al.* Neonatal and postneonatal mortality by maternal  
26 education--a population-based study of trends in the Nordic countries, 1981-2000. *Eur J*  
27 *Public Health* 2008;**18**:245–51. doi:10.1093/eurpub/ckm125  
28
- 29 36 Arntzen A, Samuelsen SO, Bakketeig LS, *et al.* Socioeconomic status and risk of infant  
30 death. A population-based study of trends in Norway, 1967-1998. *Int J Epidemiol*  
31 2004;**33**:279–88. doi:10.1093/ije/dyh054  
32
- 33 37 Gisselmann MD. Education, infant mortality, and low birth weight in Sweden 1973-1990:  
34 emergence of the low birth weight paradox. *Scand J Public Health* 2005;**33**:65–71.  
35 doi:10.1080/14034940410028352  
36
- 37 38 Johansson S, Villamor E, Altman M, *et al.* Maternal overweight and obesity in early  
38 pregnancy and risk of infant mortality: a population based cohort study in Sweden. *BMJ*  
39 2014;**349**:g6572–g6572. doi:10.1136/bmj.g6572  
40
- 41 39 Højkvalitetsvariable.  
42 <http://www.dst.dk/da/TilSalg/Forskningservice/Dokumentation/hojkvalitetsvariable>  
43 (accessed 20 May 2015).  
44
- 45 40 Wilcox AJ. *Fertility and pregnancy: an epidemiologic perspective*. Oxford ; New York: :  
46 Oxford University Press 2010.  
47
- 48 41 Mortensen LH, Diderichsen F, Davey Smith G, *et al.* Time is on whose side? Time trends in  
49 the association between maternal social disadvantage and offspring fetal growth. A study of 1  
50 409 339 births in Denmark, 1981-2004. *J Epidemiol Community Health* 2009;**63**:281–5.  
51 doi:10.1136/jech.2008.076364  
52



1  
2 42 Illemann Christensen A, Statens Institut for Folkesundhed. *Sundhed og sygelighed i Danmark*  
3 *2010 & udviklingen siden 1987*. Statens Institut for Folkesundhed 2012.  
4  
5  
6  
7  
8  
9  
10  
11  
12  
13  
14  
15  
16  
17  
18  
19  
20  
21  
22  
23  
24  
25  
26  
27  
28  
29  
30  
31  
32  
33  
34  
35  
36  
37  
38  
39  
40  
41  
42  
43  
44  
45  
46  
47  
48  
49  
50  
51  
52  
53  
54  
55  
56  
57  
58  
59  
60

For peer review only

Figure 1: Flowchart of the study populations

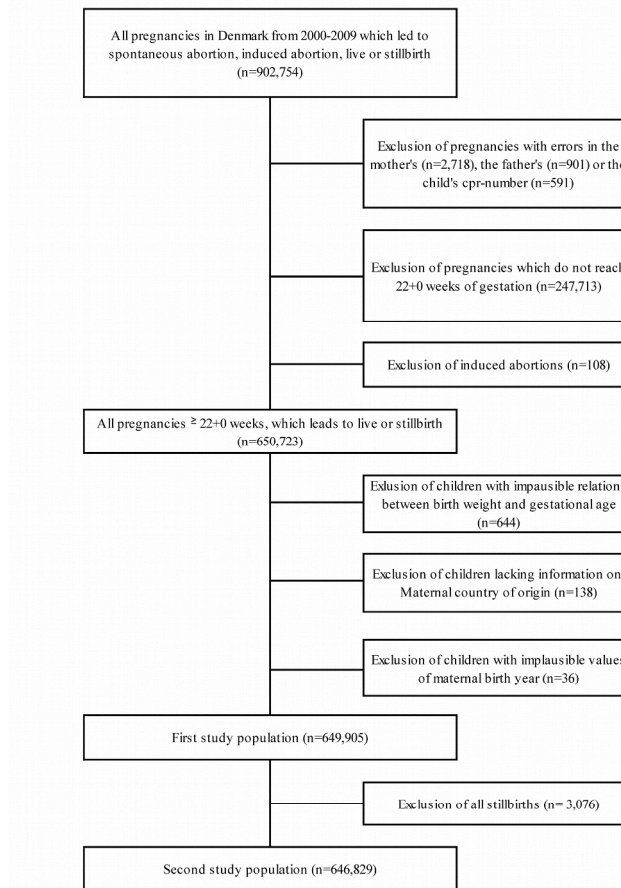

Figure 1: Flowchart of the study populations

209x297mm (300 x 300 DPI)

**STROBE 2007 (v4) Statement—Checklist of items that should be included in reports of *cohort studies***

| Section/Topic                | Item # | Recommendation                                                                                                                                                                       | Reported on page # |
|------------------------------|--------|--------------------------------------------------------------------------------------------------------------------------------------------------------------------------------------|--------------------|
| Title and abstract           | 1      | (a) Indicate the study's design with a commonly used term in the title or the abstract                                                                                               | 2                  |
|                              |        | (b) Provide in the abstract an informative and balanced summary of what was done and what was found                                                                                  | 2                  |
| <b>Introduction</b>          |        |                                                                                                                                                                                      |                    |
| Background/rationale         | 2      | Explain the scientific background and rationale for the investigation being reported                                                                                                 | 4                  |
| Objectives                   | 3      | State specific objectives, including any prespecified hypotheses                                                                                                                     | 4                  |
| <b>Methods</b>               |        |                                                                                                                                                                                      |                    |
| Study design                 | 4      | Present key elements of study design early in the paper                                                                                                                              | 5                  |
| Setting                      | 5      | Describe the setting, locations, and relevant dates, including periods of recruitment, exposure, follow-up, and data collection                                                      | 5                  |
| Participants                 | 6      | (a) Give the eligibility criteria, and the sources and methods of selection of participants. Describe methods of follow-up                                                           | 5                  |
|                              |        | (b) For matched studies, give matching criteria and number of exposed and unexposed                                                                                                  |                    |
| Variables                    | 7      | Clearly define all outcomes, exposures, predictors, potential confounders, and effect modifiers. Give diagnostic criteria, if applicable                                             | 5-6                |
| Data sources/<br>measurement | 8*     | For each variable of interest, give sources of data and details of methods of assessment (measurement). Describe comparability of assessment methods if there is more than one group |                    |
| Bias                         | 9      | Describe any efforts to address potential sources of bias                                                                                                                            | -                  |
| Study size                   | 10     | Explain how the study size was arrived at                                                                                                                                            | 5 + Figure 1       |
| Quantitative variables       | 11     | Explain how quantitative variables were handled in the analyses. If applicable, describe which groupings were chosen and why                                                         |                    |
| Statistical methods          | 12     | (a) Describe all statistical methods, including those used to control for confounding                                                                                                | 6-7                |
|                              |        | (b) Describe any methods used to examine subgroups and interactions                                                                                                                  | -                  |
|                              |        | (c) Explain how missing data were addressed                                                                                                                                          | 5-7                |
|                              |        | (d) If applicable, explain how loss to follow-up was addressed                                                                                                                       | -                  |
|                              |        | (e) Describe any sensitivity analyses                                                                                                                                                | 7                  |
| <b>Results</b>               |        |                                                                                                                                                                                      |                    |

|                          |     |                                                                                                                                                                                                              |                 |
|--------------------------|-----|--------------------------------------------------------------------------------------------------------------------------------------------------------------------------------------------------------------|-----------------|
| Participants             | 13* | (a) Report numbers of individuals at each stage of study—eg numbers potentially eligible, examined for eligibility, confirmed eligible, included in the study, completing follow-up, and analysed            | 5-7 + Figure 1  |
|                          |     | (b) Give reasons for non-participation at each stage                                                                                                                                                         | N/A             |
|                          |     | (c) Consider use of a flow diagram                                                                                                                                                                           | Figure 1        |
| Descriptive data         | 14* | (a) Give characteristics of study participants (eg demographic, clinical, social) and information on exposures and potential confounders                                                                     | Table 1, pp 7-8 |
|                          |     | (b) Indicate number of participants with missing data for each variable of interest                                                                                                                          | Figure 1        |
|                          |     | (c) Summarise follow-up time (eg, average and total amount)                                                                                                                                                  | N/A             |
| Outcome data             | 15* | Report numbers of outcome events or summary measures over time                                                                                                                                               | Table 2 pp 8-9  |
| Main results             | 16  | (a) Give unadjusted estimates and, if applicable, confounder-adjusted estimates and their precision (eg, 95% confidence interval). Make clear which confounders were adjusted for and why they were included | Table 3 pp 9-10 |
|                          |     | (b) Report category boundaries when continuous variables were categorized                                                                                                                                    | 5-8             |
|                          |     | (c) If relevant, consider translating estimates of relative risk into absolute risk for a meaningful time period                                                                                             | Considered      |
| Other analyses           | 17  | Report other analyses done—eg analyses of subgroups and interactions, and sensitivity analyses                                                                                                               | 7               |
| <b>Discussion</b>        |     |                                                                                                                                                                                                              |                 |
| Key results              | 18  | Summarise key results with reference to study objectives                                                                                                                                                     | 10              |
| <b>Limitations</b>       |     |                                                                                                                                                                                                              |                 |
| Interpretation           | 20  | Give a cautious overall interpretation of results considering objectives, limitations, multiplicity of analyses, results from similar studies, and other relevant evidence                                   | 10-12           |
| Generalisability         | 21  | Discuss the generalisability (external validity) of the study results                                                                                                                                        | 11              |
| <b>Other information</b> |     |                                                                                                                                                                                                              |                 |
| Funding                  | 22  | Give the source of funding and the role of the funders for the present study and, if applicable, for the original study on which the present article is based                                                | 13              |

\*Give information separately for cases and controls in case-control studies and, if applicable, for exposed and unexposed groups in cohort and cross-sectional studies.

**Note:** An Explanation and Elaboration article discusses each checklist item and gives methodological background and published examples of transparent reporting. The STROBE checklist is best used in conjunction with this article (freely available on the Web sites of PLoS Medicine at <http://www.plosmedicine.org/>, Annals of Internal Medicine at <http://www.annals.org/>, and Epidemiology at <http://www.epidem.com/>). Information on the STROBE Initiative is available at [www.strobe-statement.org](http://www.strobe-statement.org).
